# Supplementary material for: Chemotherapy plus bevacizumab as an optimal first-line therapeutic treatment for patients with right-sided metastatic colon cancer: a meta-analysis of first-line clinical trials
Source: PubMed Central journal article supplement — ESMO Open. 2020 Mar 9;5(2):e000605. doi: 10.1136/esmoopen-2019-000605 (PMC7064070; doi:10.1136/esmoopen-2019-000605), 2020-03-09
Supplement: esmoopen-2019-000605supp001.pdf [file esmoopen-2019-000605supp001.pdf]

### The actual retrieval strategy in present study.

**1#** (((((((((((((Neoplasms, Colorectal[Title/Abstract]) OR Colorectal Neoplasm[Title/Abstract]) OR Neoplasm, Colorectal[Title/Abstract]) OR Colorectal Tumors[Title/Abstract]) OR Colorectal Tumor[Title/Abstract]) OR Tumor, Colorectal[Title/Abstract]) OR Tumors, Colorectal[Title/Abstract]) OR Colorectal Carcinoma[Title/Abstract]) OR Carcinoma, Colorectal[Title/Abstract]) OR Carcinomas, Colorectal[Title/Abstract]) OR Colorectal Carcinomas[Title/Abstract]) OR Colorectal Cancer[Title/Abstract]) OR Cancer, Colorectal[Title/Abstract]) OR Cancers, Colorectal[Title/Abstract]) OR Colorectal Cancers[Title/Abstract])) OR "Colorectal Neoplasms"[Mesh]

**2#** (((((((((((((((Colonic Neoplasm[Title/Abstract]) OR Neoplasm, Colonic[Title/Abstract]) OR Neoplasms, Colonic[Title/Abstract]) OR Colon Neoplasms[Title/Abstract]) OR Colon Neoplasm[Title/Abstract]) OR Neoplasm, Colon[Title/Abstract]) OR Neoplasms, Colon[Title/Abstract]) OR Cancer of Colon[Title/Abstract]) OR Colon Cancers[Title/Abstract]) OR Cancer of the Colon[Title/Abstract]) OR Colonic Cancer[Title/Abstract]) OR Cancer, Colonic[Title/Abstract]) OR Cancers, Colonic[Title/Abstract]) OR Colonic Cancers[Title/Abstract]) OR Colon Cancer) OR Cancer, Colon) OR Cancers, Colon)) OR "Colonic Neoplasms"[Mesh])

**3#** (((((((((((((((Neoplasm, Rectal[Title/Abstract]) OR Rectal Neoplasm[Title/Abstract]) OR Rectum Neoplasms[Title/Abstract]) OR Neoplasm, Rectum[Title/Abstract]) OR Rectum Neoplasm[Title/Abstract]) OR Rectal Tumors[Title/Abstract]) OR Rectal Tumor[Title/Abstract]) OR Tumor, Rectal[Title/Abstract]) OR Neoplasms, Rectal[Title/Abstract]) OR Cancer of Rectum[Title/Abstract]) OR Rectum Cancers[Title/Abstract]) OR Rectal Cancer[Title/Abstract]) OR Cancer, Rectal[Title/Abstract]) OR Rectal Cancers[Title/Abstract]) OR Rectum Cancer[Title/Abstract]) OR Cancer, Rectum[Title/Abstract]) OR Cancer of the Rectum[Title/Abstract])) OR "Rectal Neoplasms"[Mesh]

**4#** (((side[Title/Abstract]) OR sidedness[Title/Abstract]) OR sided[Title/Abstract]) OR location[Title/Abstract]) OR localisation[Title/Abstract]

**5#** (survival[Title/Abstract]) OR outcome[Title/Abstract]

**6#** (((("Prognosis"[Mesh]) OR prognoses[Title/Abstract]) OR prognostic factors[Title/Abstract]) OR factor, prognostic[Title/Abstract]) OR factors, prognostic[Title/Abstract]) OR prognostic factor[Title/Abstract]

**7#=1# OR 2# OR 3#**

**8#=5# OR 6#**

**9#=7# AND 4# AND 8#**

**Supplementary Table 1** Association between primary tumor location and outcome of [first-line](#) chemotherapy treated mCRC patients in the meta-analysis (-Right vs. Left).

| Subgroup                            | Overall survival      |                       |                                 |                                 | Progression-free survival |                       |                                 |                                 |
|-------------------------------------|-----------------------|-----------------------|---------------------------------|---------------------------------|---------------------------|-----------------------|---------------------------------|---------------------------------|
|                                     | Heterogeneity test    |                       | HR (and 95% CI)                 |                                 | Heterogeneity test        |                       | HR (and 95% CI)                 |                                 |
|                                     | <i>p</i> -value       | <i>I</i> <sup>2</sup> | Fixed                           | Random                          | <i>p</i> -value           | <i>I</i> <sup>2</sup> | Fixed                           | Random                          |
| Overall population                  | 0.827                 | 0.00                  | 1.46(1.32-1.62)                 | 1.46(1.32-1.62)                 | 0.280                     | 20.4                  | 1.30(1.17-1.44)                 | 1.32(1.17-1.49)                 |
| <i>RAS</i> status                   |                       |                       |                                 |                                 |                           |                       |                                 |                                 |
| Wild type                           | 0.756                 | 0.00                  | 1.32(1.02-1.72)                 | 1.32(1.02-1.72)                 | 0.402                     | 0.00                  | 1.32(0.98-1.77)                 | 1.32(0.98-1.77)                 |
| Unknown                             | 0.731                 | 0.00                  | 1.49(1.33-1.67)                 | 1.49(1.33-1.67)                 | 0.135                     | 46.1                  | 1.30(1.16-1.44)                 | 1.33(1.14-1.56)                 |
| Race                                |                       |                       |                                 |                                 |                           |                       |                                 |                                 |
| Caucasian                           | 0.958                 | 0.00                  | 1.51(1.28-1.78)                 | 1.51(1.28-1.78)                 | 0.349                     | 4.90                  | 1.44(1.23-1.68)                 | 1.45(1.23-1.70)                 |
| Mixed                               | 0.632                 | 0.00                  | 1.48(1.28-1.70)                 | 1.48(1.28-1.70)                 | 0.519                     | 0.00                  | 1.21(1.06-1.38)                 | 1.21(1.06-1.38)                 |
| <a href="#">Metastatic setting*</a> | <a href="#">0.661</a> | <a href="#">0.00</a>  | <a href="#">1.43(1.24-1.64)</a> | <a href="#">1.43(1.24-1.64)</a> | <a href="#">0.567</a>     | <a href="#">0.00</a>  | <a href="#">1.40(1.23-1.59)</a> | <a href="#">1.40(1.23-1.59)</a> |

**Abbreviation:** HR: hazard ratio; CI: confidence interval; [metastatic setting\\*](#): the included studies with unresectable mCRC patients.

Formatted: Font: Not Bold

Formatted: Font: 10.5 pt

**Supplementary Table 2** Association between primary tumor location and outcome for mCRC patients treated with [first-line](#) chemotherapy plus bevacizumab in the meta-analysis (Left vs. Right).

| Subgroup                            | Overall survival      |                       |                                 |                                 | Progression-free survival |                       |                                 |                                 |
|-------------------------------------|-----------------------|-----------------------|---------------------------------|---------------------------------|---------------------------|-----------------------|---------------------------------|---------------------------------|
|                                     | Heterogeneity test    |                       | MSR (and 95% CI)                |                                 | Heterogeneity test        |                       | MSR (and 95% CI)                |                                 |
|                                     | <i>p</i> -value       | <i>I</i> <sup>2</sup> | Fixed                           | Random                          | <i>p</i> -value           | <i>I</i> <sup>2</sup> | Fixed                           | Random                          |
| Overall population                  | 0.000                 | 91.0                  | 1.24(1.20-1.28)                 | 1.23(1.08-1.39)                 | 0.000                     | 88.0                  | 1.13(1.10-1.18)                 | 1.03(0.92-1.16)                 |
| RAS status                          |                       |                       |                                 |                                 |                           |                       |                                 |                                 |
| Wild type                           | 0.045                 | 62.8                  | 1.24(1.15-1.35)                 | 1.29(1.12-1.48)                 | 0.169                     | 43.8                  | 1.11(1.01-1.21)                 | 1.09(0.97-1.23)                 |
| Unknown                             | 0.000                 | 94.7                  | 1.24(1.19-1.29)                 | 1.20(0.99-1.45)                 | 0.000                     | 92.0                  | 1.14(1.10-1.19)                 | 1.00(0.86-1.17)                 |
| Race                                |                       |                       |                                 |                                 |                           |                       |                                 |                                 |
| Caucasian                           | 0.000                 | 89.7                  | 1.14(1.05-1.24)                 | 1.17(0.90-1.53)                 | 0.000                     | 89.5                  | 0.97(0.88-1.07)                 | 0.93(0.67-1.28)                 |
| Mixed                               | 0.000                 | 93.2                  | 1.26(1.21-1.31)                 | 1.29(1.10-1.51)                 | 0.189                     | 34.9                  | 1.18(1.13-1.22)                 | 1.18(1.12-1.24)                 |
| <a href="#">Metastatic setting*</a> | <a href="#">0.000</a> | <a href="#">91.8</a>  | <a href="#">1.26(1.21-1.32)</a> | <a href="#">1.23(1.05-1.45)</a> | <a href="#">0.000</a>     | <a href="#">89.3</a>  | <a href="#">1.12(1.06-1.17)</a> | <a href="#">1.00(0.86-1.16)</a> |

**Abbreviation:** MSR: median survival ratio; CI: confidence interval; [metastatic setting\\*](#): the included studies with unresectable mCRC patients.

Formatted: Line spacing: Double

Formatted: Line spacing: single

Formatted: Line spacing: single

Formatted: Font: 10.5 pt

**Supplementary Table 3** Clinical outcome comparison in right-sided *RAS*-wild mCRC patients with first-line chemotherapy plus bevacizumab or chemotherapy in the meta-analysis (chemotherapy plus bevacizumab vs. chemotherapy).

| Subgroup            | Overall survival   |                       |                 |                 | Progression-free survival |                       |                 |                 |
|---------------------|--------------------|-----------------------|-----------------|-----------------|---------------------------|-----------------------|-----------------|-----------------|
|                     | Heterogeneity test |                       | MSR(95% CI)     |                 | Heterogeneity test        |                       | MSR(95% CI)     |                 |
|                     | <i>p</i> -value    | <i>I</i> <sup>2</sup> | Fixed           | Random          | <i>p</i> -value           | <i>I</i> <sup>2</sup> | Fixed           | Random          |
| Overall population  | 0.658              | 0.000                 | 1.21(1.11-1.31) | 1.21(1.11-1.31) | 0.009                     | 0.787                 | 1.37(1.26-1.48) | 1.40(1.15-1.71) |
| Metastatic setting* | 0.363              | 0.000                 | 1.20(1.06-1.36) | 1.20(1.06-1.36) | 0.369                     | 0.0                   | 1.57(1.39-1.77) | 1.57(1.39-1.77) |

**Abbreviation:** MSR: median survival ratio; CI: confidence interval; metastatic setting: the included studies with unresectable mCRC patients.

**Supplementary Table 43** Outcome comparison of right-sided mCRC patients treated with chemotherapy plus bevacizumab or chemotherapy plus anti-EGFR mAbs in meta-analysis (chemotherapy plus bevacizumab vs. chemotherapy plus anti-EGFR mAbs).

|                | FIRE 3<br>(Right-sided N=88) |              | CALGB 80405<br>(Right-sided N=149) |                      | PEAK<br>(Right-sided N=36) |               | p-value | I <sup>2</sup> | Combined<br>HR(95%CI) |
|----------------|------------------------------|--------------|------------------------------------|----------------------|----------------------------|---------------|---------|----------------|-----------------------|
|                | FOLFIRI                      | FOLFIRI      | FOLFIRI/                           | FOLFIRI/             | FOLFOX6                    | FOLFOX6       |         |                |                       |
|                | +Bev<br>n=50                 | +Cet<br>n=38 | FOLFOX6+ Bev<br>n=78               | FOLFOX6+ Cet<br>n=71 | +Bev<br>n=14               | +Pani<br>n=22 |         |                |                       |
| OS             |                              |              |                                    |                      |                            |               |         |                |                       |
| Median, months | 23.0                         | 18.3         | 29.2                               | 13.6                 | 21.04                      | 17.4          |         |                |                       |
| HR (95%CI)     | 0.76(0.47-1.23)              |              | 0.74(0.50-1.08)                    |                      | 0.67(0.30-1.50)            |               | 0.966   | 0.0            | 0.74(0.56-0.98)       |
| PFS            |                              |              |                                    |                      |                            |               |         |                |                       |
| Median, months | 9.0                          | 7.6          | 10.2                               | 7.5                  | 12.6                       | 8.7           |         |                |                       |
| HR (95%CI)     | 0.69(0.44-1.09)              |              | 0.61(0.42-0.87)                    |                      | 0.96(0.46-2.00)            |               | 0.552   | 0.0            | 0.67(0.52-0.88)       |

**Abbreviation:** OS: overall survival; PFS: progression-free survival; OR: odds ratio; HR: hazard ratio; CI: confidence interval; Bev: bevacizumab; Cet: cetuximab; Pani: panitumumab; FOLFIRI: fluorouracil, leucovorin and irinotecan; FOLFOX: fluorouracil, leucovorin and oxaliplatin.

Formatted: Font: 10.5 pt

Formatted: Font: 10.5 pt

Formatted: Font: 10.5 pt

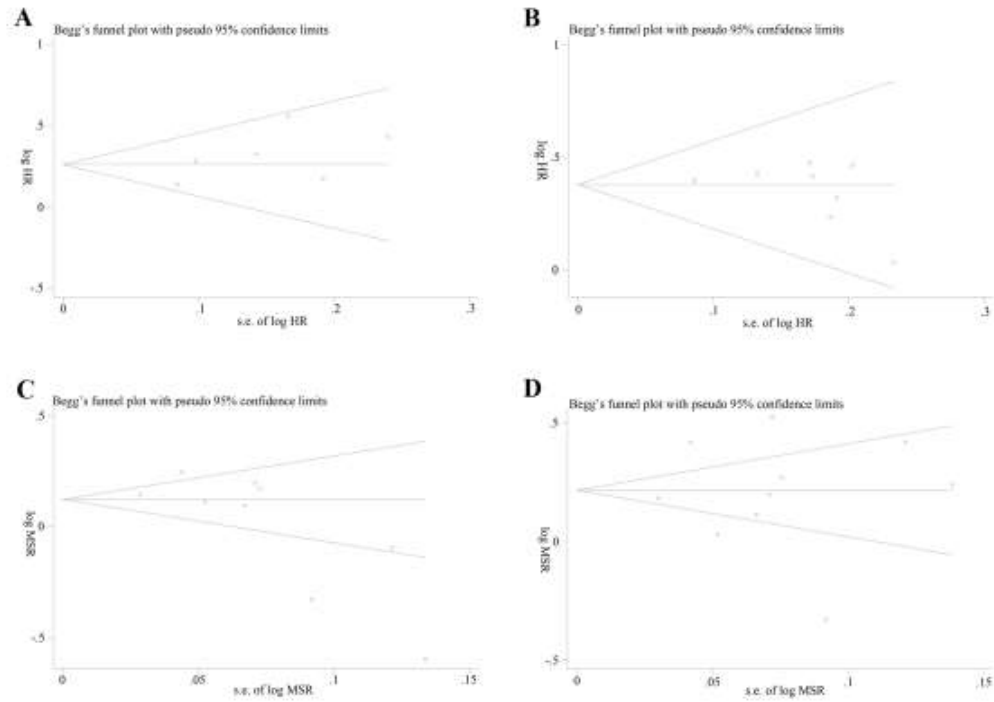

Supplementary Figure 1
